# Supplementary material
Source: PubMed Central journal article supplement (PMC3973733)
Supplement: rna-11-146-s01.pdf [file rna-11-146-s01.pdf]

## **Supplemental Material to:**

**Oliver Rossbach, Lee-Hsueh Hung, Ekaterina Khrameeva,  
Silke Schreiner, Julian König, Tomaz Curk, Blaž Zupan,  
Jernej Ule, Mikhail S Gelfand, Albrecht Bindereif**

**Crosslinking-immunoprecipitation (iCLIP) analysis  
reveals global regulatory roles of hnRNP L**

**2014; 11(2)**

**<http://dx.doi.org/10.4161/rna.27991>**

**[www.landesbioscience.com/journals/rnabiology/article/27991/](http://www.landesbioscience.com/journals/rnabiology/article/27991/)**

# 1 Supplementary Figures

**A**

|              | sequence reads<br>(Solexa 50-bp) | crosslink sites<br>in chromosomes<br>1-22 and X |
|--------------|----------------------------------|-------------------------------------------------|
| hnRNP L-IP_1 | 13 327 397                       | 590 960                                         |
| hnRNP L-IP_2 | 1 220 636                        | 259 045                                         |
| hnRNP L-IP_3 | 1 210 822                        | 303 483                                         |
| FLAG-IP_1    | 469 975                          | 18 857                                          |
| FLAG-IP_2    | 8 571                            | 1 092                                           |
| FLAG-IP_3    | 78 225                           | 9 279                                           |

1 109 962 hnRNP L crosslink sites  
 ↓ clustering  
 786 192 crosslink sites clusters  
 ↓ filtering  
 415 606 crosslink site clusters  
 (containing 622 798 crosslink sites)

**B**

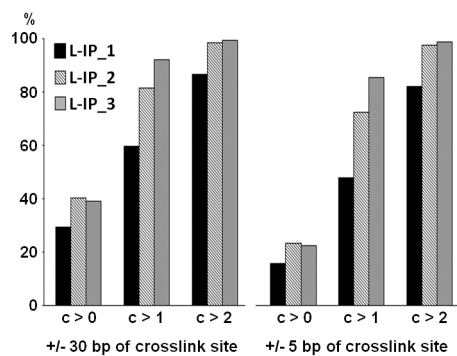

2

3

## 4 Supplementary Figure S1.

5 HnRNP L crosslink-site data processing and reproducibility.

6 (A) Flow chart of data processing from Solexa sequence reads, derived from three

7 independent hnRNP L iCLIP experiments (hnRNP L-IP\_1 to \_3) and three FLAG controls

8 (FLAG-IP\_1 to \_3), to filtered crosslink sites, which entered functional analysis. Note that the

9 initial sequence read number does not represent the entire data content of the experiments.

10 Only random barcode-filtered, uniquely mapped reads have an absolute quantitative value,

11 since the deviation between sequence reads and crosslink sites is due to multiple

12 sequencing of the same PCR product. The twofold difference between hnRNP L-IP\_1 and

13 the other two experiments is due to experiment 1 being sequenced separately, and

14 experiments 2 and 3 together in one Solexa flow-cell lane.

15 (B) Reproducibility of three hnRNP L iCLIP experiments (for details, see *Supplementary*

16 *Materials and Methods*, section 1).

17

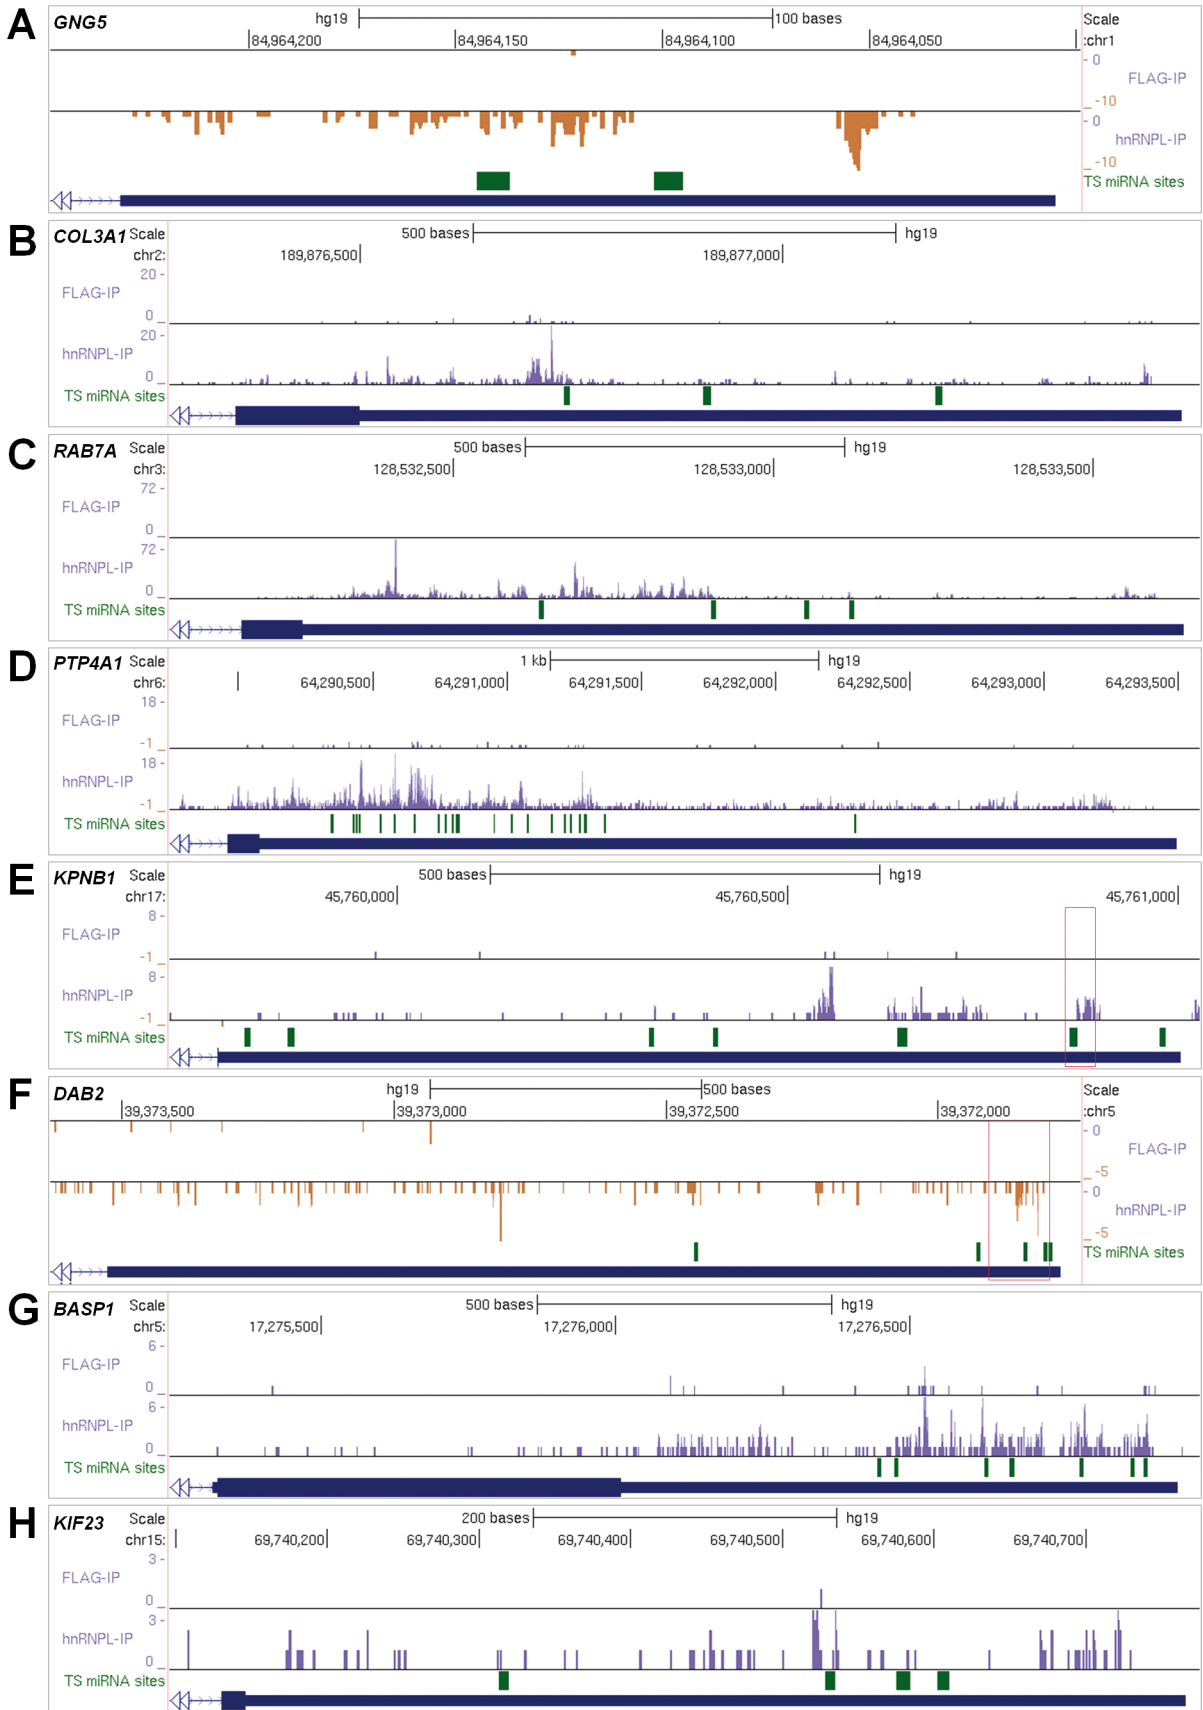

1

2

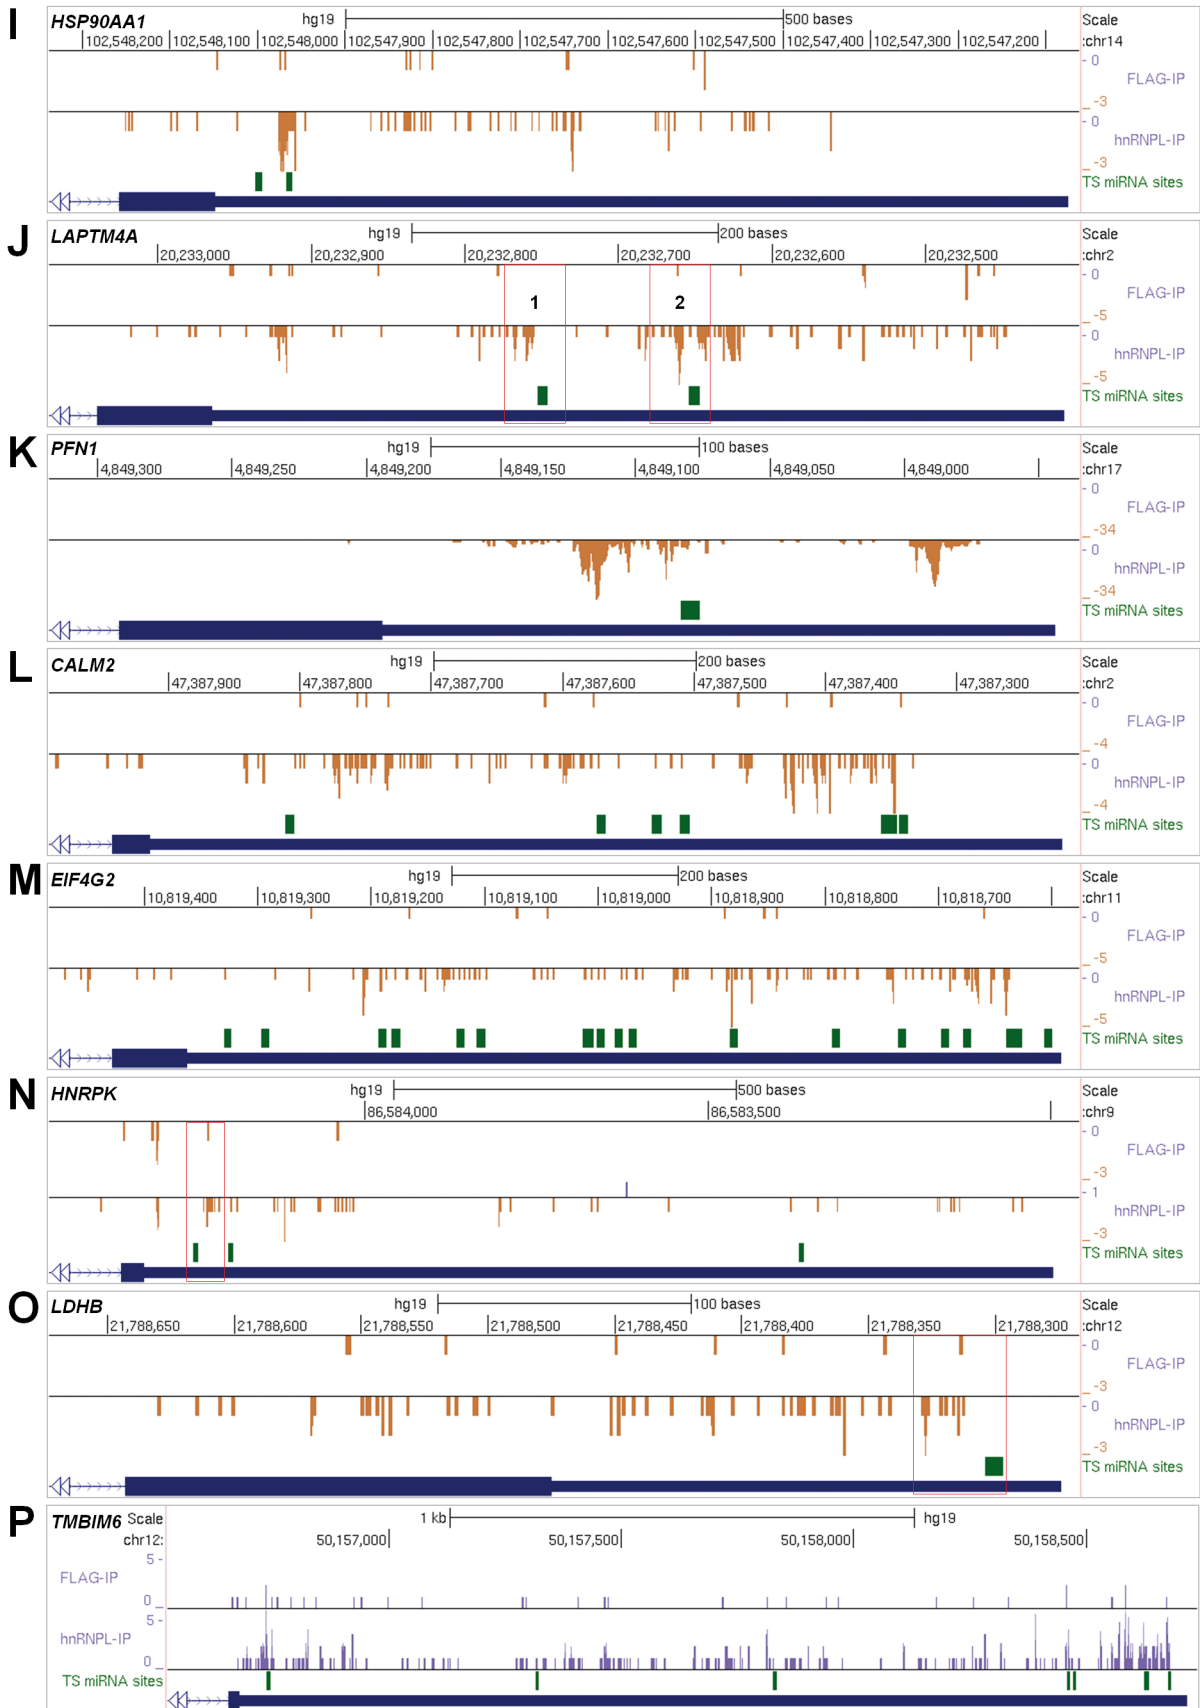

1  
2  
3

1 **Supplementary Figure S2.**

2 HnRNP L binds preferentially in close proximity to predicted miRNA binding sites: searching  
3 for co-regulated targets.

4 Labeling in each panel from top: scale with genome annotation, chromosome position,  
5 crosslink sites obtained from the control (FLAG-IP) and the hnRNP L iCLIP experiment  
6 (hnRNPL-IP). Crosslink sites are represented either in blue (plus strand) or in orange (minus  
7 strand). Below (in green) the TargetScan-predicted miRNA binding sites (TS miRNA sites),  
8 and on the bottom, the gene structure in the 3' UTR region are represented.

9 **(A)-(P)** UCSC browser views of candidate 3' UTR targets predicted to be coregulated by  
10 hnRNP L and a specific miRNA. Targets shown in panels A-G were derived from scanning  
11 for dense binding clusters (based on hnRNP L iCLIP data) that overlap with TargetScan-  
12 predicted miRNA binding sites of miRNAs expressed in HeLa cells.<sup>44</sup> Targets shown in  
13 panels H-P were derived from scanning the top Ago2 binding clusters (based on PAR-CLIP  
14 data<sup>45</sup>) that overlap with dense hnRNP L binding clusters and TargetScan-predicted miRNA  
15 binding sites.

16 The target 3' UTR regions that were cloned in the firefly luciferase reporter (**Fig. 6E**) are  
17 indicated by red boxes. Note that in the case of *LAPTM4A* (**Fig. S2J**), two different 3' UTR  
18 regions were investigated (labeled by digits 1 and 2; *LAPTM4A.1* and *LAPTM4A.2* in  
19 **Fig. 6E**).

20

## 1 **Supplementary Materials and Methods**

### 3 **1. Data processing of hnRNP L crosslink sites from three independent experiments.**

4 All crosslink sites in chromosomes 1-22 and X derived from three independent iCLIP  
5 experiments of hnRNP L were combined, yielding a total number of 1,109,962 sites (see  
6 **Fig. S1A** for detailed numbers from each dataset). To assess the reproducibility between the  
7 three experiments, we took each crosslink site (*position\_A*) from one experiment and  
8 checked whether the crosslink site could be found in at least one of the two experiments  
9 within 30 bp (or 5 bp) up- and downstream of *position\_A* (defined here as *positive*). The  
10 crosslink sites were further grouped according to their cDNA count (uniquely mapped  
11 sequenced reads, random barcode filtered; see ref. 25 for details) as following:

- 12 a) all sites taken ( $c > 0$ ),
- 13 b) minimal cDNA count of 2 ( $c > 1$ ),
- 14 c) minimal cDNA count of 3 ( $c > 2$ ).

15 **Fig. S1B** shows the percentage of crosslink sites, which are *positive*, if a 30-bp (left  
16 panel) or a 5-bp (right panel) distance was used in each group. The values in experiment L-  
17 IP\_1 were lower than in experiments L-IP\_2 and L-IP\_3, due to the approximately tenfold  
18 higher crosslink site count in experiment L-IP\_1. The very high percentage (87% in 30-bp;  
19 82% in 5-bp) of *positive* crosslink sites (in group  $c>2$ ) confirms the high reproducibility of  
20 these three experiment.

21 Crosslink sites were grouped into one cluster, if the distance between two sites was  
22 less than 31 nts. Sequence motif analysis was applied with these 785,192 cluster sequences  
23 (including 30 bp up- and downstream regions of each cluster). Based on our SELEX  
24 consensus for hnRNP L, the frequency of each 4-mer sequence motif found in all SELEX-  
25 derived binding sequences was calculated.<sup>1</sup> We defined the *score-index* of each cluster  
26 sequence as the sum of the frequencies for all 4-mer motifs divided by the length of the  
27 sequence. Sequences in the clusters with very low *score-indices* are T- or A- rich and  
28 contain T- or A-stretches at a high frequency. We interpret this to mean that the T-rich

1 sequences are due to the chemical bias and uridine preference of UV-crosslinking. Since  
2 hnRNP L binds frequently in 3' UTR regions (see **Fig. 2B**) and the crosslink site density  
3 increases in the proximity of the poly(A) sites (see **Fig. 4**), the sequence reads containing A-  
4 stretches were most likely mapped incorrectly, contributing to the enrichment of A-rich  
5 sequence motifs. Therefore data filtering to exclude cross-link sites within these low-score  
6 clusters would improve our functional analysis. As a result, we selected 415,606 clusters  
7 (~53% of total) with a *score-index* higher than 0.06. All crosslink sites (n = 622,798) in the  
8 415,606 selected clusters were used for downstream data analysis.

9

## 10 **2. Pentamer enrichment analysis.**

11 To investigate the hnRNP L binding motif in the iCLIP dataset, we evaluated the  
12 occurrence of all pentamers within a -30 to -10 and +10 to +30 window around the crosslink  
13 sites, excluding the central 20 positions because of the strong chemical uridine bias of the  
14 UV-crosslink.<sup>47</sup> The enrichment was determined by comparing the occurrence of each  
15 pentamer around the true crosslink site with the occurrence at randomized crosslink  
16 positions. The positions of crosslink sites were randomized within the same regions of the  
17 gene (i.e., within the same intron, CDS, or UTR). Pentamers were then ranked by their  
18 enrichment, and the top 10 pentamers are shown in **Fig. 2A**.

19

## 20 **3. Distribution of hnRNP L crosslink sites around splice sites of protein-coding genes.**

21 We used the ENCODE GENCODE V4 Gene Annotations (level 1+2+3; May 2010) for  
22 functional analysis of the hnRNP L crosslink sites.

23 First, all internal exons of all annotated transcripts from protein-coding genes were  
24 selected, and their 3' and 5' splice sites checked separately. All 3' (5') splice sites were  
25 grouped as **alternative** 3' (5') splice sites, if there was evidence of their alternative usage,  
26 otherwise, as **constitutive**.

27 The number of crosslink sites (frequency) found around the alternative 3' splice sites  
28 (positions -200 to +75, total of 60,959 splice sites; **Fig. 3A**, upper panel left) and 5' splice

1 sites (positions -75 to +200, total of 57,898 splice sites; **Fig. 3A**, upper panel right) were  
2 plotted with the position index on the X-axis and the frequency on the Y-axis. In analogy, the  
3 frequency around constitutive 3' splice sites (positions -200 to +75, total of 143,296 splice  
4 sites; **Fig. 3A**, middle panel left) and 5' splice sites (positions -75 to +200, total of 146,357  
5 splice sites; **Fig. 3A**, middle panel right) were plotted.

6 For direct comparison, the frequency of constitutive versus alternative splice sites  
7 was normalized by the ratio of the total number of alternative to constitutive splice sites  
8 ( $60,959 / 143,296 = 0.396$  for 3' splice sites;  $57,898 / 146,357 = 0.425$  for 5' splice sites) and  
9 plotted in smooth lines (**Fig. 3A**, lower panel in green: alternative, in black: constitutive).

10

#### 11 **4. Alternative splicing targets detected by exon microarray analysis after hnRNP L** 12 **knockdown and cycloheximide treatment in HeLa cells.**

13 Total RNA after hnRNP L knockdown (luciferase GL2 as control), and cycloheximide  
14 treatment was isolated from HeLa cells.<sup>24</sup> All 6 samples (three biological replicates each of  
15 luciferase control and hnRNP L RNAi knockdown) were processed according to Affymetrix's  
16 standard protocol (GeneChip Whole Transcript (WT) Sense Target Labeling Assay Manual).  
17 The GeneChip Human Exon 1.0 Array (<http://www.affymetrix.com>) was applied to monitor  
18 differences of exon expression signals between the two sample groups. Normalized signal  
19 intensities (in  $\log_2$  values) of *present* (expressed) probesets were selected for further  
20 downstream analysis.<sup>10</sup>

21 First, *present* probesets were re-assigned (based on their position annotation) to the  
22 exons of the protein-coding genes from ENCODE GENCODE V4 Gene Annotations.  
23 Second, 8,376 genes (defined here as *expressed multi-exon genes*) with more than three  
24 exons and with probesets in at least 50% of their constitutive exons (both constitutive 3' and  
25 5' splice sites as described in section 2) were selected.

26 Second, the expression level of each gene was calculated with both median  
27 (*gene\_mean*) and mean (*gene\_mrdian*) of the signal intensity of all exons, and the mean  
28 values of the three replicates in each sample group were assigned. The differential



1 expression of each gene between the two sample groups (hnRNP L knockdown versus  
2 luciferase) was calculated with both *gene\_mean* (*diff\_gene\_mean*) and *gene\_median*  
3 (*diff\_gene\_median*) values. A total of 5,828 genes without significant gene expression  
4 changes (both *diff\_gene\_mean* and *diff\_gene\_median* value within the range of -0.25 to  
5 0.25) were selected for alternative splicing target analysis.

6 Third, only internal exons in the 5,828 genes selected were further analyzed. The  
7 differential expression of each exon (*diff\_exon*; hnRNP L knockdown – luciferase) between  
8 the two sample groups (hnRNP L knockdown - luciferase) was calculated with the mean  
9 values of the exon signal from the three replicates. Exon inclusion index (EI) of each exon was  
10 then calculated by three methods:

- 11 1) *EI\_mean*: *diff\_exon* - *diff\_gene\_mean*,
- 12 2) *EI\_median*: *diff\_exon* - *diff\_gene\_median*,
- 13 3) *EI\_Zscore*: z-score of each *diff\_exon* from all exons of the gene.

14

15 Two types of alternative splicing targets of hnRNP L were detected:

16 1) hnRNP L-activated: Exon inclusion index lower than 0 (exon inclusion rate decreased  
17 upon hnRNP L knockdown). 890 exons meet the criteria below and were selected as targets  
18 where hnRNP L acts as splicing activator:

$$19 \quad EI\_mean \leq -0.75 \text{ AND } EI\_median \leq -0.75 \text{ AND } EI\_Zscore \leq -2.$$

20

21 2) hnRNP L-repressed: Exon inclusion index higher than 0 (exon inclusion rate increased  
22 upon hnRNP L knockdown). 574 exons meet the criteria below and were selected as targets  
23 where hnRNP L acts as splicing repressor:

$$24 \quad EI\_mean \geq 0.75 \text{ AND } EI\_median \geq 0.75 \text{ AND } EI\_Zscore \geq 2.$$

25

## 26 **5. Distribution of hnRNP L crosslink sites around alternative splicing target exons.**

27 Three groups of exons were defined (as described above in section 3): L-activated, L-  
28 repressed, and background (all internal exons from the 5,828 genes expressed and without

1 significant expression changes as described in section 3). The number of crosslink sites  
2 (frequency) found around the 3' (positions -300 to +75) and 5' splice sites (positions -75 to  
3 +300) of exon grouped as activated (n = 890, **Fig. 3B** upper panel, red) and repressed (n =  
4 574, **Fig. 3B** middle panel, blue) were plotted with position index on the X-axis and frequency  
5 on the Y-axis. The frequency of background exons were plotted in black. For comparison, the  
6 frequency of activated and repressed target were plotted in smooth lines (**Fig. 3B** lower  
7 panel).

8

## 9 **6. Distribution of hnRNP L crosslink sites around polyadenylation sites.**

10 All polyadenylation sites from protein-coding genes were selected, and grouped into  
11 1) *internal*: all poly(A) sites upstream of the annotated most downstream poly(A) site,  
12 2) *terminal*: most downstream poly(A) site of each gene.

13 The number of crosslink sites (frequency) found around the poly(A) sites (positions -  
14 300 to +300) of the *internal* group (total of 17,576 sites; **Fig. 4**, upper panel) and *terminal*  
15 group (total of 19,687 sites; **Fig. 4**, middle panel) were plotted with the position index on the  
16 X-axis and the frequency on the Y-axis. For comparison, the frequency of *internal* versus  
17 *terminal* poly(A) sites – after normalization by the ratio of *internal*-to-*terminal* sites ( $17,576 /$   
18  $19,687 = 0.893$ ) were plotted in smooth lines (**Fig. 4**, lower panel).

19

## 20 **7. Distribution of hnRNP L crosslink sites in 3'UTR and miRNA target sites.**

21 For miRNA target sites we extracted the conserved mammalian miRNA regulatory  
22 target sites in the 3' UTR regions of RefSeq genes as predicted by TargetScanHuman 5.1  
23 (<http://www.targetscan.org>). The crosslink site counts (frequency) around the miRNA target  
24 sites (position -80 to +80 of target site, on X-axis) were plotted on the Y-axis (**Fig. 5C**)

25 From the 3' UTRs of the protein-coding genes from ENCODE annotation, 5,062  
26 3'UTRs containing both crosslink and miRNA target sites were selected for further analysis.  
27 We compared the crosslink site density (crosslink site count / sequence length) around  
28 miRNA target sites (**MS**, from position -20 to +20 of target site) with the density outside the

1 miRNA target sites in 3' UTR (**NS**). For each of the 5 062 3' UTRs, the density of **MS** was  
2 plotted on the X-axis and **NS** on the Y-axis (**Fig. 5D**). The red line shows the slope (0.59)  
3 using the Linear Model. The density in miRNA target sites was significantly higher than non-  
4 target region in 3' UTR (p value =  $2.2 \times 10^{-16}$ ).

5

## 6 **8. Oligonucleotides.**

7 RT-PCR primers (Sigma):

|    |              |                       |
|----|--------------|-----------------------|
| 8  | GNG5 fwd     | AAGTGGTTCAACAGCTCCGG  |
| 9  | GNG5 rev     | CTGGGGTCTGAAGGGATTTGT |
| 10 | COL3A1 fwd   | TCGAGGCAGTGATGGTCAAC  |
| 11 | COL3A1 rev   | CGGGACCCATTTTCGCCTTTA |
| 12 | RAB7A-1 fwd  | GGAGGTGATGGTGGATGACA  |
| 13 | RAB7A-1 rev  | GCACCTCTGTAGAAGGCCAC  |
| 14 | RAB7A-2 fwd  | AAACGGAGGTGGAGCTGTAC  |
| 15 | RAB7A-2 rev  | TGTGCTCAACTCTCACTGCC  |
| 16 | PTP4A1 fwd   | GCTCCAGTACTTGTTGCCCT  |
| 17 | PTP4A1 rev   | TGGAATCTTTGAAACGCAGCC |
| 18 | KPNB1 fwd    | ACCACATTGCTGGAGATGAGG |
| 19 | KPNB1 rev    | CGATCTCCGCCCTTCAGTTA  |
| 20 | DAB2 fwd     | TCTGTCCAGTCCTCACCACA  |
| 21 | DAB2 rev     | CTGAGACGGGAGGAGCAAAG  |
| 22 | BASP1 fwd    | GCTAACTCAGGGGCTGCATA  |
| 23 | BASP1 rev    | CTCCTTGGCTTTCTCGTCGT  |
| 24 | KIF23 fwd    | GGACCAGAGCAGAAGGGAAC  |
| 25 | KIF23 rev    | ACACACGATCATCCGCACTT  |
| 26 | HSP90AA1 fwd | GTACGCTTGGGAGTCCTCAG  |
| 27 | HSP90AA1 rev | TCTTCAGCCTCATCATCGCTT |
| 28 | LAPTM4A fwd  | TCCATGCCAGCTGTCAACAT  |

|    |                                    |                         |               |
|----|------------------------------------|-------------------------|---------------|
| 1  | LAPTM4A rev                        | GGAATCAGCCAACCCACTTG    |               |
| 2  | PFN1 fwd                           | CGCCTACATCGACAACCTCA    |               |
| 3  | PFN1 rev                           | AAATTCCCCATCCTGCAGCA    |               |
| 4  | CALM2 fwd                          | GGCAGAATCCCACAGAAGCA    |               |
| 5  | CALM2 rev                          | CACATGGCGAAGTTCTGCAG    |               |
| 6  | EIF4G2 fwd                         | GTGGAAATGCAAATGAGGCTGT  |               |
| 7  | EIF4G2 rev                         | ACCAGCTCTGAAATGATGGCA   |               |
| 8  | HNRNPK fwd                         | TGCGAGTTGAGGCTGTTGAT    |               |
| 9  | HNRNPK rev                         | TAAGGCTGTGCACGTCCTTT    |               |
| 10 | LDHB fwd                           | CAGCAAGAAGGGGAGAGTCG    |               |
| 11 | LDHB rev                           | CACGCGGTGTTTGGGTAATC    |               |
| 12 | TMBIM6 fwd                         | GTCATGTGTGGCTTCGTCCT    |               |
| 13 | TMBIM6 rev                         | TTGGGAAAGGCTGGATGGTC    |               |
| 14 | ACTB fwd                           | TGGACTTCGAGCAAGAGATG    |               |
| 15 | ACTB rev                           | GTGATCTCCTTCTGCATCCTG   |               |
| 16 | GAPDH fwd                          | GAGTCAACGGATTTGGTCGT    |               |
| 17 | GAPDH rev                          | GATCTCGCTCCTGGAAGATG    |               |
| 18 | U1 snRNA fwd                       | GGGGAGATACCATGATCACG    |               |
| 19 | U1 snRNA rev                       | GTCGAGTTTCCCACATTTGG    |               |
| 20 |                                    |                         |               |
| 21 | siRNAs:                            |                         |               |
| 22 | hnRNP L 3'-UTR                     | GACAUUUCUCUUUCCUUUAdTdT | (Sigma)       |
| 23 | hnRNP L H1 (exon 4)                | GAAUGGAGUUCAGGCGAUGdTdT | (MWG Biotech) |
| 24 | luciferase GL2                     | CGUACGCGGAAUACUUCGAdTdT | (MWG Biotech) |
| 25 |                                    |                         |               |
| 26 | iCLIP RNA 3'-linker (Dharmacon):   |                         |               |
| 27 | P-UGAGAUCGGAAGAGCGGUUCAG-Puromycin |                         |               |
| 28 |                                    |                         |               |

1 iCLIP RT-primers (Eurogentech):

2 iCLIP-RT1 P-NNAACCNNAAGATCGGAAGAGCGTCGTGgatcCTGAACCGC

3 iCLIP-RT2 P-NNACAANNAAGATCGGAAGAGCGTCGTGgatcCTGAACCGC

4 iCLIP-RT3 P-NNCTAANNAAGATCGGAAGAGCGTCGTGgatcCTGAACCGC

5 iCLIP-RT4 P-NNCATTNNAAGATCGGAAGAGCGTCGTGgatcCTGAACCGC

6 iCLIP-RT5 P-NNGCCANNAAGATCGGAAGAGCGTCGTGgatcCTGAACCGC

7

8 iCLIP BamHI-linearization oligonucleotide (MWG Biotech):

9 Cut\_oligo GTTCAGGATCCACGACGCTCTTCAAAA

10

11

12

### 13 **Supplementary Material References**

14

- 15 47. Sugimoto Y, König J, Hussain S, Zupan B, Curk T, Frye M, Ule J. Analysis of CLIP  
16 and iCLIP methods for nucleotide-resolution studies of protein-RNA interactions.  
17 Genome Biol 2012; 13:R67.
